# Supplementary material for: PLD2 regulates microtubule stability and spindle migration in mouse oocytes during meiotic division
Source: PubMed Central journal article supplement (PMC5436581; doi:10.7717/peerj.3295), 2017-05-16

### Spindle length of oocytes (L value) after FIPI treatment

| Replicates | DMSO      | 12.5 $\mu$ M FIPI | 25 $\mu$ M FIPI | 37.5 $\mu$ M FIPI |
|------------|-----------|-------------------|-----------------|-------------------|
| 1          | 0.2031888 | 0.2166102         | 0.2343498       | 0.2034701         |
| 2          | 0.2242580 | 0.2329463         | 0.2481365       | 0.2579766         |
| 3          | 0.2644219 | 0.2453822         | 0.2445720       | 0.2620143         |

**Declaration: Spindles in MI oocytes were measured and compared.**

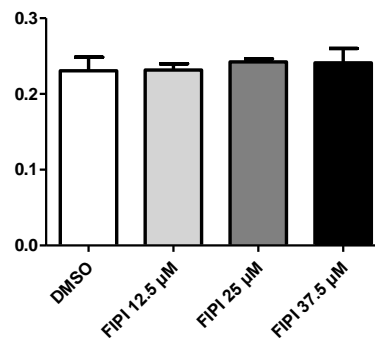

Supplement: peerj-05-3295-s001.pdf [file peerj-05-3295-s001.pdf]
