# Supplementary material for: PLD2 regulates microtubule stability and spindle migration in mouse oocytes during meiotic division
Source: PubMed Central journal article supplement (PMC5436581; doi:10.7717/peerj.3295), 2017-05-16
Supplement: peerj-05-3295-s002.pdf [file peerj-05-3295-s002.pdf]

## Supplementary data

### S1 NFOT inhibitory effect on oocytes meiotic progression to MII stage was reversible

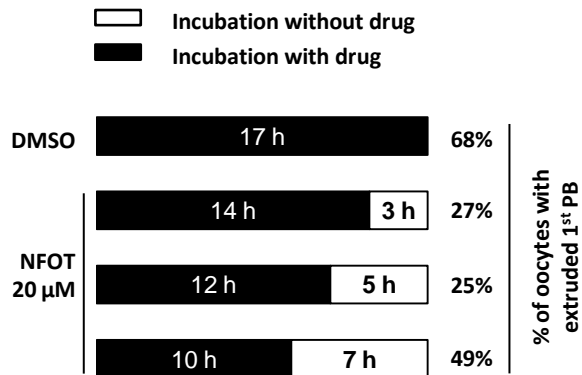

**S1 legend:** GV oocytes were cultured for 10 h, 12 h and 14 h, respectively, in maturation medium with NFOT, and accordingly, additional 7 h, 5 h and 3 h in fresh medium without NFOT. Oocytes cultured only with DMSO for 17 h were used as control. After a total 17 h culture, the oocytes matured to MII stage, manifested with extruded 1<sup>st</sup> PB, were counted. With the decrease in NFOT incubation time, the proportion of MII oocytes was increased.
